1 **Measurement error and resolution in quantitative stable isotope probing: implications for**  
2 **experimental design**

3

4 Ella T. Sieradzki<sup>1</sup>, Benjamin J. Koch<sup>2</sup>, Alex Greenlon<sup>1</sup>, Rohan Sachdeva<sup>3</sup>, Rex R. Malmstrom<sup>4</sup>,  
5 Rebecca L. Mau<sup>2</sup>, Steven J. Blazewicz<sup>5</sup>, Mary K. Firestone<sup>1</sup>, Kirsten Hofmockel<sup>7</sup>, Egbert  
6 Schwartz<sup>2,6</sup>, Bruce A. Hungate<sup>2,6#</sup>, Jennifer Pett-Ridge<sup>5#</sup>

7

8 <sup>1</sup> University of California Berkeley, Environmental Science and Policy Management, Berkeley,  
9 California, USA

10 <sup>2</sup> Center for Ecosystem Science and Society, Northern Arizona University, Flagstaff, Arizona,  
11 USA

12 <sup>3</sup> University of California Berkeley, Earth and Planetary Sciences, Berkeley, California, USA

13 <sup>4</sup> Department of Energy Joint Genome Institute, Berkeley, California, USA

14 <sup>5</sup> Lawrence Livermore National Laboratory, Livermore, California, USA

15 <sup>6</sup> Department of Biological Sciences, Northern Arizona University, Flagstaff, Arizona, USA

16 <sup>7</sup> Pacific Northwest National Laboratory, Richland, Washington, USA

17 # Address correspondence to:

18 Jennifer Pett-Ridge [pettridge2@llnl.gov](mailto:pettridge2@llnl.gov) and Bruce Hungate [Bruce.Hungate@nau.edu](mailto:Bruce.Hungate@nau.edu)

19

20 Running Head: qSIP sensitivity and reproducibility analysis

21

22

23

24 **Abstract**

25 Quantitative stable isotope probing (qSIP) estimates the degree of incorporation of an isotope  
26 tracer into nucleic acids of metabolically active organisms and can be applied to microorganisms  
27 growing in complex communities, such as the microbiomes of soil or water. As such, qSIP has  
28 the potential to link microbial biodiversity and biogeochemistry. As with any technique  
29 involving quantitative estimation, qSIP involves measurement error; a more complete  
30 understanding of error, precision and statistical power will aid in the design of qSIP experiments  
31 and interpretation of qSIP data. We used several existing qSIP datasets of microbial communities  
32 found in soil and water to evaluate how variance in the estimate of isotope incorporation depends  
33 on organism abundance and on the resolution of the density fractionation scheme. We also  
34 assessed statistical power for replicated qSIP studies, and sensitivity and specificity for  
35 unreplicated designs. We found that variance declines as taxon abundance increases. Increasing  
36 the number of density fractions reduces variance, although the benefit of added fractions declines  
37 as the number of fractions increases. Specifically, nine fractions appear to be a reasonable  
38 tradeoff between cost and precision for most qSIP applications. Increasing replication improves  
39 power and reduces the minimum detectable threshold for inferring isotope uptake to 5 atom%.  
40 Finally, we provide evidence for the importance of internal standards to calibrate the %GC to  
41 mean weighted density regression per sample. These results should benefit those designing  
42 future SIP experiments, and provide a reference for metagenomic SIP applications where  
43 financial and computational limitations constrain experimental scope.

44

45

46

## 47 **Importance**

48

49 One of the biggest challenges in microbial ecology is correlating the identity of microorganisms  
50 with the roles they fulfill in natural environmental systems. Studies of microbes in pure culture  
51 reveal much about genomic content and potential functions, but may not reflect an organism's  
52 activity within its natural community. Culture-independent studies supply a community-wide  
53 view of composition and function in the context of community interactions, but fail to link the  
54 two. Quantitative stable isotope probing (qSIP) is a method that can link the identity and function  
55 of specific microbes within a naturally occurring community. Here we explore how the  
56 resolution of density-gradient fractionation affects the error and precision of qSIP results, how  
57 they may be improved via additional replication, and cost-benefit balanced scenarios for SIP  
58 experimental design.

59

## 60 **Introduction**

61

62 Stable Isotope Probing (SIP) of nucleic acids is one of the few non-culture dependent methods  
63 that can identify the functionality of microorganisms in their native environments, making it one  
64 of the most powerful techniques in microbial ecology (Radajewski et al. 2000; Manefield et al.  
65 2002; Radajewski, McDonald, and Murrell 2003; Neufeld et al. 2007; Chen and Murrell 2010).  
66 In SIP, a substrate labeled with a heavy isotope is added to an environmental sample. Following  
67 an incubation period ranging from hours to weeks (depending on the substrate uptake rate) the  
68 DNA (or RNA) of growing microorganisms that have consumed the isotope-enriched substrate  
69 becomes more dense due to their incorporation of the heavy isotope. Community nucleic acids

70 can then be extracted and separated in a density gradient using ultracentrifugation. DNA/RNA  
71 from organisms that incorporated the labeled substrate will appear in denser fractions of the  
72 gradient compared to where they would be with addition of an unlabeled substrate (Lueders,  
73 Manefield, and Friedrich 2004; Neufeld et al. 2007). While there has been some consideration of  
74 best practices for handling SIP data (Neufeld et al. 2007; Lueders et al., 2010; Hungate et al.  
75 2015; Youngblut, Barnett, and Buckley 2018; Barnett, Youngblut, and Buckley 2019; Dumont  
76 and García 2019; Barnett and Buckley 2020), there remain outstanding methodological issues  
77 and questions regarding reproducibility, sensitivity and the minimum detectable effect size, some  
78 of which we address here.

79 A major advantage of SIP is that it can be performed on intact environmental communities,  
80 thereby taking into account microbial interactions which are missed in cultivation-based studies.  
81 Most current SIP methods require amplifying marker genes, usually 16S rRNA, from each  
82 fraction to identify substrate assimilators. However, to look at multitrophic interactions beyond  
83 co-occurrence, it is more ideal to use shotgun sequencing of whole community DNA, but the  
84 combination of SIP with metagenomic analysis quickly becomes limiting both financially and  
85 computationally. Therefore, some investigators have tried to limit shotgun sequencing either by  
86 sequencing only highly labeled fractions (Barnett and Buckley 2020), by pooling density  
87 fractions or by sequencing the unfractionated DNA and matching assembled genomes to SIP-  
88 identified substrate assimilators (Dumont et al. 2006; Murrell and Whiteley 2010; Dombrowski  
89 et al. 2016; Thomas, Corre, and Cébron 2019; Sieradzki, Morando, and Fuhrman 2019). Since  
90 metagenomic sequencing leads to financial and computational costs that are much higher than  
91 those of 16S analysis, the knowledge of the minimum number of fractions that can lead to a  
92 comparable result will be crucial.

93 Quantitative SIP (qSIP) is a recently developed adaptation of SIP that makes substrate uptake  
94 measurements possible at the individual or population genome scale (Hungate et al. 2015; Koch  
95 et al. 2018). In qSIP, isopycnic separation of nucleic acids in cesium chloride is combined with a  
96 mathematical model to quantify isotope enrichment. This approach allows a user to measure  
97 growth and mortality rates of individual taxa in complex communities, particularly when using  
98  $^{18}\text{O}$ -labeled ‘heavy water’ as a substrate –since cells incorporate oxygen from water during  
99 nucleic acid synthesis, quantitatively reflecting cell division (DNA synthesis) and metabolism  
100 (RNA synthesis) (Schwartz 2007; Blazewicz and Schwartz 2011). Similarly, cell mortality rates  
101 may be quantitatively related to the degradation of unlabeled nucleic acids. By normalizing  
102 relative abundance to the total number of organisms per fraction estimated by qPCR of 16S-  
103 rRNA, qSIP has been shown to be less susceptible to taxon abundance and level of enrichment  
104 compared to other SIP methods (Youngblut, Barnett, and Buckley 2018). Hence, qSIP may be a  
105 preferred approach for combining SIP and metagenomics.

106 Designing qSIP experiments involves a tension between collecting many density fractions per  
107 sample (small fraction size) versus the costs of labor and sequencing. While early SIP studies  
108 inspected only the ‘heaviest’ fractions—considered to host the most isotopically enriched  
109 DNA—these fractions may contain unlabeled high GC-content DNA. The current practice is to  
110 examine many density fractions and perform statistical analyses comparing isotope-labeled  
111 versus unlabeled controls, to indicate the extent to which organisms have “shifted” within a  
112 density gradient in response to the isotope treatment (Hungate et al. 2015; Youngblut, Barnett,  
113 and Buckley 2018). Density shifts can be used to calculate substrate assimilation rate per taxon  
114 (atom % excess), and when using the universal substrate  $\text{H}_2^{18}\text{O}$ , they can be used to infer specific  
115 growth rates (Blazewicz and Schwartz 2011; Blazewicz, Schwartz, and Firestone 2014; Papp et

116 al. 2018; Koch et al. 2018). However, even the most basic experiment (e.g one type of substrate,  
117 2 timepoints, 3 replicates, 10 density fractions per sample) can easily generate over 100 samples  
118 for processing and sequencing. Thus, it is critical to know how to balance experimental design to  
119 ensure high quality data at sustainable costs. Doing so becomes even more important as we  
120 transition to more ambitious applications, such as metagenomics qSIP (MG-qSIP), since shotgun  
121 sequencing adds even higher costs and the amount of data per sample quickly becomes a  
122 computational limitation.

123 Within a replicated qSIP experiment, it is possible to evaluate statistical power - the probability  
124 of detecting a given level of isotopic enrichment. Yet, power is rarely evaluated, because, in  
125 practice, avoiding Type I errors is prioritized above avoiding Type II errors. Traditionally, many  
126 view that incorrectly inferring that a treatment is effective is more hazardous than concluding it  
127 is not effective, when in fact it is. Power analysis involves evaluating the tradeoffs among  
128 several parameters: 1) The effect size of interest, which in the case of qSIP experiments is the  
129 density shift (or amount of isotope incorporation) that the researcher wishes to detect (this can be  
130 thought of as the minimum detectable difference); 2) the acceptable  $\alpha$  value, or acceptable  
131 probability of Type I error (for qSIP, a type I error occurs when the researcher concludes that  
132 there is isotope incorporation when in fact none occurred); 3) the acceptable  $\beta$  value, or  
133 acceptable probability of Type II error (for qSIP, a Type II error occurs when the researcher  
134 infers “no isotope incorporation”, when in fact some isotope incorporation actually occurred);  
135 and 4) the number of true, independent, replicates (sample size) used in the experiment. Power is  
136 defined as  $1 - \beta$ . It is the probability that a true difference will be detected in a given  
137 experimental design. Applied to qSIP, power analysis can show how increasing the number of  
138 replicates increases the probability of detecting a given level of isotope incorporation. Power

139 analysis can also show, at constant level of power, how increasing the number of replicates  
140 decreases the threshold level of isotope incorporation that can be detected. Lastly, power analysis  
141 can clarify the tradeoffs between Type I and Type II errors, which can provide useful context for  
142 interpreting results from qSIP experiments.

143 One way to address issues inherent to metagenomic analysis (e.g. higher amounts of DNA  
144 required for sequencing, higher sequencing costs and exponentially increased computational  
145 complexity) is to reduce the number of density fractions. In addition, adding replication with a  
146 reduced number of fractions (gradient resolution) could lead to higher accuracy while  
147 maintaining a similar effort to high gradient resolution without replication. We investigated the  
148 repercussions of reducing the number of density fractions on replicated and unreplicated datasets  
149 from marine and terrestrial microbial communities using different isotopes.

150 Using multiple SIP datasets, we tested the robustness of qSIP with variation in density fraction  
151 size. We combined (in-silico) density fractions from real datasets and measured the effects of  
152 lower gradient resolution on per-taxon density shifts and unlabeled weighted mean density. We  
153 show that reducing the gradient resolution from an average density fraction size of  $0.002 \text{ g ml}^{-1}$   
154 down to  $0.011 \text{ g ml}^{-1}$  (50 to 9 fractions of a 5 ml tube) yields comparable shift detection with a  
155 detection limit of  $0.005 \text{ g ml}^{-1}$  (9% enrichment with  $^{13}\text{C}$ ). We discuss using the small inherent  
156 variability between replicates as a way to define a shift detection limit. Finally, we show that this  
157 inherent variability is more similar between replicates centrifuged together (within spin) than  
158 between replicates centrifuged separately (between spins), stressing the need for internal  
159 standards that can be spiked into each sample rather than external standards.

160

161

## 162 **Methods**

163

164 We used five datasets representing different ecosystems for *in silico* analyses: a high resolution  
165 unreplicated SIP study of <sup>13</sup>naphthalene in seawater, two medium resolution replicated SIP  
166 experiments where <sup>18</sup>O-water was added to soils, replicated genomic DNA from pure cultures of  
167 *Escherichia coli* and *Pseudomonas putida*, and a replicated genomic mock community  
168 comprised of high molecular weight genomic DNA of *Thermoanaerobacter pseudethanolicus*,  
169 *Bacillus licheniformis*, *Bifidobacterium longum* subsp. *Infantis* and *Streptomyces violaceoruber*  
170 purchased from ATCC. See table 1 for number of density fractions and number of replicates per  
171 dataset.

172 As these experiments were performed by different laboratories, using slightly different protocols,  
173 we describe their SIP pipelines separately. However, all post-sequencing steps were performed  
174 identically for all 16S-rRNA operational taxonomic units (OTUs).

175

### 176 *Naphthalene enriched seawater dataset*

177

178 Surface seawater was collected from the port of Los Angeles in July 2014 and May 2015. Ten  
179 liters of water were incubated at ambient temperature with 400 nM <sup>12</sup>C- or <sup>13</sup>C-naphthalene for  
180 24 hours (July 2014) or 88 hours (May 2015). The water was then filtered sequentially through  
181 an 80 nM mesh, a 1 μ prefilter (Acrodisc syringe glass fiber, Pall Laboratory) and a 0.2 μ  
182 polyethersulfone (PES) Sterivex filter (Millipore). After filtration, 1.5ml Sodium-Chloride-Tris-  
183 EDTA (STE) buffer was injected into the Sterivex casing and the filters were promptly sealed  
184 and stored in -80°C.



185 DNA was extracted from the Sterivex filters by bead beating (10 minutes), transferring the lysate  
186 into DNeasy plant kit columns (Qiagen) and following the kit protocol. The eluted DNA was  
187 stored in -80°C until use.

188 In preparation for ultracentrifugation, 1 µg of eluted DNA from the labeled (<sup>13</sup>C) and control  
189 (<sup>12</sup>C) incubations was mixed with CsCl solution and gradient buffer (GB) for a final density of  
190 1.725 g ml<sup>-1</sup>. The gradients were centrifuged in a Beckman NVT 65.2 rotor at 44,100 rpm for 64-  
191 68 h at 20°C. Following centrifugation each gradient was manually fractionated into 50 equal  
192 fractions of 100 µl each. The density of each fraction was determined using a handheld AR200  
193 digital refractometer by removing 10 µl per fraction.

194 DNA in each fraction was purified and concentrated using glycogen/PEG precipitations followed  
195 by an ethanol washing and elution in Tris-EDTA buffer (TE). DNA was then quantified by  
196 PicoGreen assay (Life Technologies). The 16S-rRNA coding gene hypervariable regions V4-V5  
197 were amplified from each fraction that contained DNA using universal primers 515F-N and  
198 926R (Parada, Needham, and Fuhrman 2016). Each reaction tube contained 10 µM of each  
199 primer, 1 ng of DNA, 12 µl 5Prime Hot Master Mix and 10 µl PCR water. The thermocycler was  
200 set to 3 minutes denaturation at 95°C; 30 cycles of: denaturation 95°C 45 seconds, annealing  
201 50°C 45 seconds and elongation 68°C 90 seconds; followed by a final elongation step at 68°C for  
202 5 minutes. PCR products were cleaned using 1x Agencourt AMPure XP beads (Beckman  
203 Coulter), quantified via PicoGreen, and pooled in equimolar amounts and sequenced on Illumina  
204 MiSeq 2x300bp. Mock communities and PCR blanks were included in all sequencing runs (Yeh  
205 et al. 2018).

206

207 *Soil <sup>18</sup>O-water dataset 1: spruce peatland*

208  
209 Soil samples (0-10cm; n=5) were collected from the Marcell Experimental Forest, located in  
210 northern Minnesota in August 2017. Samples were then air-dried in the lab to minimize O16-  
211 water content. One-half gram dry weight soil was weighed into 15mL Falcon tubes and pre-  
212 incubated at one of five temperatures (n=20) for approximately 48 hours in the dark: 5C, 15C,  
213 25C, or 35C. After pre-incubation, half the samples received enough natural abundance O16-  
214 labeled water (n=10) to bring the sample up to 60% field capacity, and the other half (n=10)  
215 received 97-atom % O18-labeled water. Samples were placed back at their original incubation  
216 temperature and harvested after 5 (n=5) and 10 days (n=5). Lids of the Falcon tubes were opened  
217 every ~24 hours to allow for CO<sub>2</sub> release. Samples were frozen at -80C until further processing.  
218 DNA was extracted using a PowerSoil DNA extraction kit following manufacturer's instructions  
219 (MoBio Laboratories, Carlsbad, CA). For stable isotope probing, approximately 1 g of DNA was  
220 loaded into a 4.7 mL ultracentrifuge tube with 6.88 g of a saturated cesium chloride solution and  
221 filled with gradient buffer (200 mM Tris, 200 mM KCl, 2 mM EDTA). Samples were spun in a  
222 Beckman OptimaMax benchtop ultracentrifuge (Indianapolis, IN, USA) using a Beckman TLA-  
223 110 rotor at 150,200 x g at 18C for 72 hours. Tubes were fractionated into approx. 20 fractions  
224 of 200 L each and the density of each fraction was measured with a Reichart AR200 digital  
225 refractometer (Buffalo, NY, USA). DNA was purified using a standard isopropanol precipitation  
226 method and quantified by PicoGreen<sup>TM</sup> fluorescence on a BioTek Synergy HT plate reader  
227 (Winooski, VT, USA).  
228 The V3-V4 region of the 16S rRNA gene was subsequently quantified and sequenced in samples  
229 within the density range of 1.640 – 1.746 g mL<sup>-1</sup> (approx. 15 fractions per sample). To quantify  
230 the 16S rRNA gene, qPCR was performed in triplicate using a Bio-Rad CFX384 Touch real-time

231 PCR detection system (Hercules, CA, USA) and primers Eub338F (5'-  
232 ACTCCTACGGGAGGCAGCAG-3') and Eub518R (5'-ATTACCGCGGCTGCTGG-3') (Fierer  
233 et al. 2005). The 10  $\mu$ L qPCR reactions contained 1  $\mu$ L of sample and 9  $\mu$ L of master mix (0.25  
234 mM of each primer, 1X Forget-Me-Not EvaGreen qPCR mix (Biotium, Fremont, CA), and 0.4  
235 mg mL<sup>-1</sup> BSA. The PCR program used was as follows: 95°C for 2 min, followed by 40 cycles of  
236 95°C for 30s, 59°C for 10s, and 72°C for 10 sec.

237 For sequencing, two PCR steps were used to process the samples, as in Berry et al. (2011). Each  
238 sample was first amplified using primers 515F (Parada) (5'-GTGYCAGCMGCCGCGGTAA-3')  
239 and 806R (Apprill) (5'-GGACTACNVGGGTWTCTAAT -3') (Apprill et al. 2015; Parada,  
240 Needham, and Fuhrman 2016). This was done in duplicate 10  $\mu$ L PCR reactions containing 1  $\mu$ L  
241 of DNA template and 9  $\mu$ L of master mix (1  $\mu$ M of each primer, 1X Phusion Green HotStart II  
242 Polymerase (Thermo Fisher Scientific, Waltham MA) and 1.5 mM MgCL<sub>2</sub>). PCR conditions  
243 were 95°C for 2 min, then 15 cycles of 95°C for 30s, 55°C for 30s and 72°C for 10 s. Initial  
244 duplicate PCR products were pooled, checked on a 1% agarose gel, 2-fold diluted, and used as  
245 template in the subsequent tailing reaction with the same primers that included the Illumina  
246 flowcell adapter sequences and a 12 nucleotide Golay barcode (15 cycles identical to initial  
247 amplification conditions). Amplicons were then purified with 0.1% carboxyl-modified Sera-Mag  
248 magnetic Speed-beads (Thermo Fisher Scientific, Fremont, CA, USA) in 18% PEG and  
249 quantified with a PicoGreen<sup>TM</sup> assay on a BioTek Synergy HT plate reader. Samples were then  
250 pooled at the same concentration, purified again with the Sera-Mag beads as described above,  
251 and quantified with the KAPA Sybr Fast qPCR kit (Wilmington, MA, USA). Libraries were  
252 sequenced on an Illumina MiSeq (San Diego, CA, USA) instrument at Northern Arizona

253 University's Environmental Genetics and Genomics Laboratory, using a 300 cycle v2 reagent  
254 kit.

255

256 *Soil 18O-water dataset 2: Grassland*

257

258 A 10 x 4.5 cm soil core was collected using an AMS 15 x 4.5 cm soil core sampler from the  
259 upper layer of soil at the Buck field site at Hopland Research and Extension Center, Hopland  
260 California in February 2018, and transported on wet ice and stored at 4C for one month. The core  
261 was homogenized and split into two microcosms; half of the microcosms were wetted with <sup>16</sup>O-  
262 H<sub>2</sub>O and the other half with 97-atom% <sup>18</sup>O-H<sub>2</sub>O and incubated for 8 days at room temperature.  
263 DNA was extracted from each sample using the PowerSoil DNA extraction kit following  
264 manufacturer's instructions (MoBio Laboratories, Carlsbad, CA). DNA was added to cesium  
265 CsCl solution and gradient buffer (GB) for a final density of 1.725 g ml<sup>-1</sup>. The gradients were  
266 centrifuged in a Beckman VTi 65.2 rotor at 44,100 rpm for 109 h at 20°C. Following  
267 centrifugation each gradient was fractionated into 38 equal fractions of 135 µl each. The density  
268 of each fraction was determined using a handheld AR200 digital refractometer by removing 5 µl  
269 per fraction. DNA in each fraction was purified and concentrated using glycogen/PEG  
270 precipitations followed by an ethanol washing and elution in Tris-EDTA buffer (TE). DNA was  
271 then quantified by PicoGreen assay (Life Technologies). Fractions were pooled to nine sets,  
272 encompassing 1.6900-1.7099, 1.7100-1.7149, 1.7150-1.7199, 1.7200-1.7249, 1.7250-1.7299,  
273 1.7300-1.7349, 1.7350-1.7399, 1.7400-1.7468, and 1.7469-1.7720 g/mL density ranges. DNA  
274 from each fraction—as well as unfractionated DNA from each mesocosm—was fragmented  
275 using the Bioruptor Pico sonicator (Diagenode Inc, Denville, NJ) and prepared for shotgun

276 metagenomic sequencing using the Kapa Hyperprep Plus kit with 3 rounds of PCR amplification  
277 (Kapa Biosystems, Wilmington, MA), and sequenced to an average depth of 7 gbp per fraction  
278 on the Illumina NovaSeq (Illumina, San Diego, CA).  
279 Reads from each library were processed for PhiX and adapter contamination using bbdduk  
280 (<https://jgi.doe.gov/data-and-tools/bbtools/bb-tools-user-guide/bbduk-guide/>) and low-quality  
281 base pairs trimmed using sickle (<https://github.com/ucdavis-bioinformatics/sickle>) with default  
282 settings. Trimmed reads for all fractions from each mesocosm were assembled together with  
283 megahit (Li et al. 2015) with --k-min 21 --k-step 6 --k-max 255. Reads from each fraction from  
284 both mesocosms were mapped to each metagenomic assembly using bbmap  
285 (<https://jgi.doe.gov/data-and-tools/bbtools/bb-tools-user-guide/bbmap-guide/>) with fast=t  
286 ambig=random and minid=0.98. Metagenomic contigs from each assembly were binned into  
287 draft microbial genomes using metabat2 (Kang et al. 2019). Reads from trimmed libraries were  
288 mapped again to one genome bin of interest with bowtie2 (Langmead and Salzberg 2013), read-  
289 depth calculated in 1kb windows across the genome bin using bedtools coverage (Quinlan 2014),  
290 and visualized with custom r scripts relative to average GC (calculated using custom python  
291 scripts).

292

### 293 *Genomic mock communities and pure cultures*

294

295 DNA for the genomic mock communities was purchased from ATCC, resuspended in Tris-  
296 eDTA buffer, mixed in equal proportions and aliquoted into replicates. The mock communities  
297 were composed of high molecular weight DNA of *Thermoanaerobacter pseudethanolicus*,  
298 *Bacillus licheniformis*, *Bifidobacterium longum* subsp. *Infantis* and *Streptomyces violaceoruber*

299 (see sup. Table S1 for accession numbers). These genomes were selected for their  
300 distinguishable %GC content (34.5%, 46%, 60% and 73% respectively). These mock  
301 communities as well as DNA extracted from pure cultures of *Escherichia coli* K-12 and  
302 *Pseudomonas putida* KT2440 was centrifuged in a Beckman VTi 66.2 rotor at 20°C for 120  
303 hours at 44,000 RPM. These samples were fractionated by Agilent 1260 Infinity II analytical-  
304 scale fraction collector with isocratic pump followed by precipitation, washing and elution by a  
305 Hamilton Vantage pipetting robot. DNA was quantified using Quant-iT DNA High Sensitivity  
306 Assay.

307

### 308 *16S-based microbial community composition in individual fractions*

309

310 Each dataset was processed separately. Reads were quality-trimmed using Trimmomatic version  
311 0.33 (Bolger, Lohse, and Usadel 2014) with parameters set to LEADING:20 TRAILING:20  
312 SLIDINGWINDOW:15:25. The resulting reads were merged using Usearch version 7 (Edgar  
313 2010), clustered in Mothur following the MiSeq SOP and classified using the Silva taxonomy  
314 database version 119 (Schloss et al. 2009; Pruesse, Peplies, and Glöckner 2012; Kozich et al.  
315 2013).

316 To track individual operational taxonomic units (OTUs) over density fractions, the relative  
317 abundance of the OTU in each fraction was multiplied by either the concentration of DNA in the  
318 same fraction (seawater) or the total 16S copy number (soil dataset 1). The results were  
319 normalized to the total abundance of that OTU over all fractions for an area of 100% under each  
320 curve.

321

322 *Density shifts*

323

324 The weighted mean density of each OTU in labeled and control samples was calculated by  
325 multiplying density by OTU abundance (amount of DNA/16S copies \* OTU relative abundance)  
326 within each fraction, summing up the products and dividing them by the sum of abundances of  
327 the OTU across all fractions. The weighted mean density shift was calculated by subtracting the  
328 weighted mean density of the OTU in the natural abundance treatment from the labeled sample.  
329 The density shifts were plotted in R (Team 2018) for the 100 most abundant OTUs in each  
330 sample.

331 Relative error was calculated as: let  $r$  be a gradient resolution ( $r < \text{original number of fractions}$   
332 ( $r_{\max}$ )). The relative error is the difference between the density shift per OTU in resolution  $r$   
333 minus the shift per OTU in  $r_{\max}$ .

334

335 *Sensitivity analysis*

336

337 Using unlabeled replicated ( $N=10$ ) samples from soil dataset 1, we calculated the weighted mean  
338 density and its standard deviation for each of the 100 most abundant OTUs. We used two  
339 standard deviations as the detection limit per OTU under the assumption that a shift that is  
340 smaller than or equal to the natural variability in the unlabeled weighted mean is not detectable.  
341 For the OTU abundance effect on WMD variability we used 320 OTUs from the same dataset.

342

343 *Sensitivity to number of fractions*

344

345 We used datasets 1 and 2 to estimate how precision in the estimate of isotope incorporation  
346 varies with the number of density fractions collected in a qSIP experiment. We combined  
347 fractions in silico to simulate experiments with fewer fractions (f), with the following principles:  
348 1) Only adjacent fractions were combined. 2) Fraction combinations were conducted in order to  
349 create new, combined fractions that were approximately equal in size and sequencing depth (i.e.,  
350 with minimal variation in the range of densities represented by each simulated fraction). For  
351 example, to simulate an experiment where only two density fractions were collected, we ran  
352 three possible scenarios: combining the lightest 8, 9 or 10 fractions into one, simulated fraction  
353 and combining the heaviest 8, 9, or 10 fractions into a second, simulated fraction (9 v 9, 8 v 10,  
354 or 10 v 8). We did this to simulate typical approaches to SIP experiments, where fractions that  
355 span similar density ranges are typically selected. For each permuted combination in the  
356 replicated dataset 2, we ran the qSIP code  
357 (<https://rdrr.io/github/bramstone/qSIP/f/README.md>) and estimated atom percent excess  $^{18}\text{O}$   
358 for each replicate tube, and then calculated the standard deviation in that estimate across all  
359 replicates (n=5). Finally, we calculated the relative standard deviation as a function of increasing  
360 number of fractions included in the simulation compared to the original number of fractions.

361

### 362 *Power analysis*

363

364 We evaluated statistical power using the SPRUCE dataset. We used data from soils incubated for  
365 10 days at an intermediate temperature (15 °C), sampled after 5 and 10 days of exposure to  $^{18}\text{O}$ -  
366  $\text{H}_2\text{O}$ . The unlabeled control was sampled at day 0. The power analysis focused on taxa that  
367 occurred in all 15 samples (n=5 for control,  $^{18}\text{O}$ - $\text{H}_2\text{O}$  at day 5, and  $^{18}\text{O}$ - $\text{H}_2\text{O}$  at day 10), omitting



368 taxa in the uppermost 5<sup>th</sup> percentile for standard deviation of the estimate of weighted average  
369 density, which are likely to be rare taxa (see Figure 1). We used observed variation among taxa  
370 for day 5 and day 10 in weighted average density shift, which ranged from -0.003 to 0.033 g cm<sup>-3</sup>.  
371 <sup>3</sup>. This captures a wide range of possible values of isotope uptake, from ~0 to ~60 atom percent  
372 excess <sup>18</sup>O. We used resampling with replacement to estimate power. For each taxon at each  
373 sample date, *N* random samples were drawn (with replacement) from each the <sup>18</sup>O-labeled and  
374 unlabeled datasets, a t-test was performed, and the P-value was recorded. This was repeated 1000  
375 times, and power was estimated as the frequency of significant t-tests among the 1000  
376 simulations. *N* was varied to simulate experiments with different numbers of replicates by  
377 pruning or duplicating replicates from the original dataset, ranging from *N*=2 to *N*=6. Average  
378 power was calculated across all taxa. The upper 10<sup>th</sup> percentile was also calculated to estimate  
379 power typical for more dominant taxa.

380

381 Table 1: Datasets used in this study including source, number of replicates and analyses

382 performed

383

| Dataset                       | Replicates | Fractions |
|-------------------------------|------------|-----------|
| Naphthalene enriched seawater | 1          | 50        |
| SPRUCE peatland               | 5          | 18        |
| Grassland                     | 3          | 9         |

|                                     |     |    |
|-------------------------------------|-----|----|
| <i>E. coli</i> and <i>P. putida</i> | 4-6 | 30 |
| Mock community                      | 9   | 48 |

384

## 385 **Results**

386

### 387 *Abundance is negatively correlated to qSIP variation*

388

389 Density shifts, or change in weighted mean density (WMD), due to incorporation of a stable  
390 isotope labeled substrate are the basis for calculating isotope enrichment. Those shifts have been  
391 shown in-silico to be detectable with qSIP in moderately to highly abundant OTUs (>0.1%  
392 relative abundance) (Youngblut, Barnett, and Buckley 2018). First, we set out to ground-truth  
393 this finding using experimental data. We show that the variability of the unlabeled WMD is  
394 negatively correlated to the abundance of OTUs. Namely, the more abundant an OTU is - the  
395 more consistent its WMD is (Fig. 1).

396 The physics of the behavior of DNA within density gradient centrifugation affects the number of  
397 fractions in which presence of OTUs can be detected. The long tails of DNA to density  
398 distributions are attributed to a smear of DNA along the tube wall (Youngblut, Barnett, and  
399 Buckley 2018). It stands to reason that the more abundant an OTU - the higher its representation  
400 in this smear will be. In addition, the detection limit of an OTU affects the number of fractions it  
401 will be detected in. Indeed, we show that when inspecting presence/absence of OTUs in all  
402 fractions, OTU abundance is positively correlated with the proportion of fractions in which it is  
403 present (Fig. 1). Abundant OTUs appear in almost all fractions, whereas rare OTUs appear in

404 few fractions, and in some cases only one fraction. These rare OTUs also have highly variable  
405 WMD values.

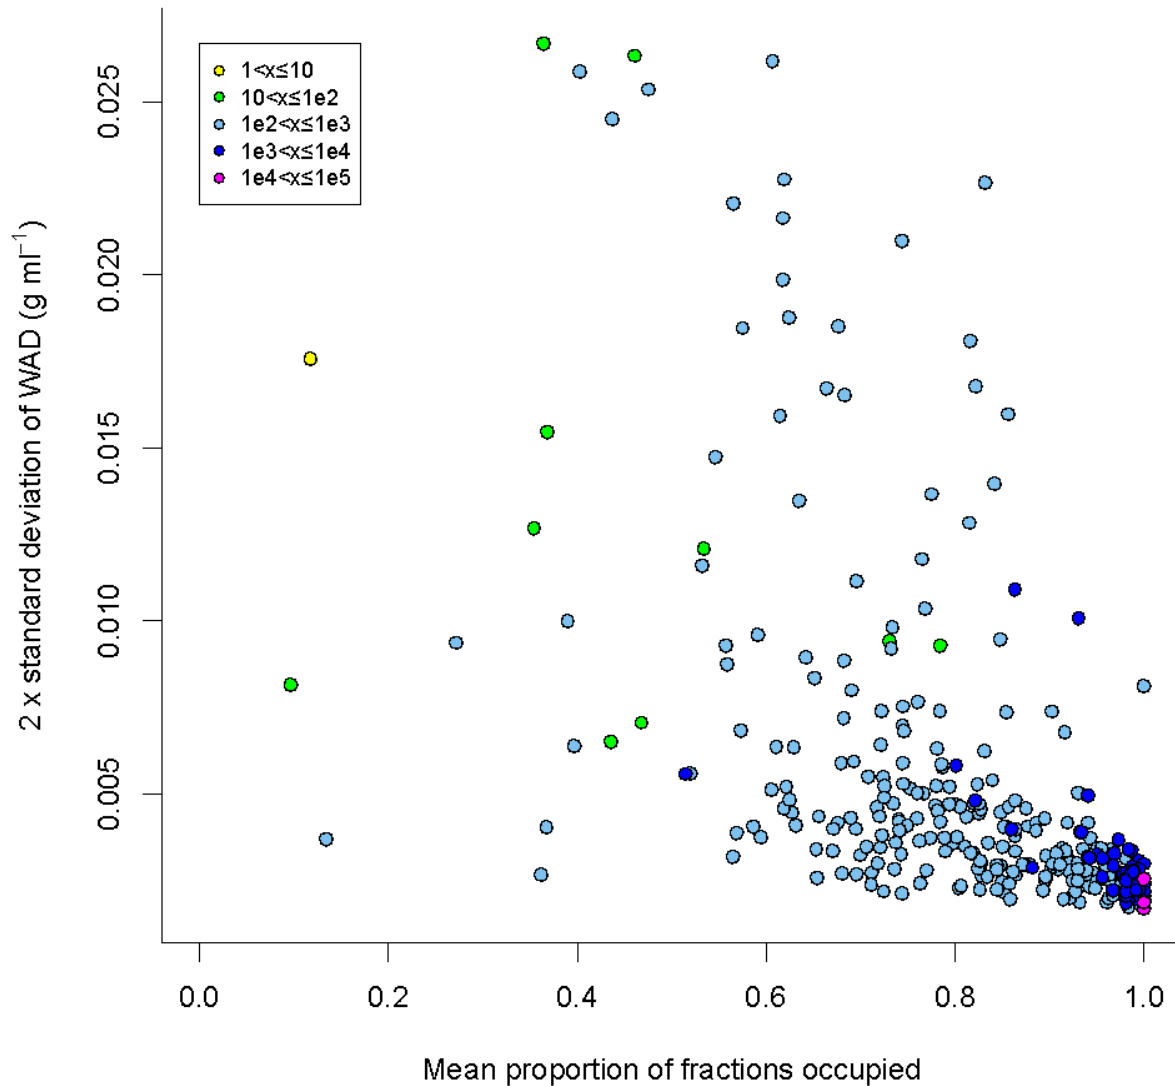

406

407 **Figure 1: The effect of OTU abundance on qSIP sensitivity**

408 OTU abundance is positively correlated to the number of fractions in which it can be detected

409 and negatively correlated to the standard deviation of its unlabeled weighted mean density.

410 Coefficient of variation (standard deviation divided by the mean) of the weighted mean density  
411 of 320 from soil dataset 1. As a function of the proportion of density fractions the OTU appears  
412 in. The colors represent the abundance of the OTU in the unfractionated sample in 16S copy  
413 number.

414

415 *Density shifts are consistent across medium to high gradient fractionation resolution*

416

417 We started with an unreplicated dataset of OTUs from naphthalene-enriched seawater DNA  
418 divided into 50 fractions of which 45 had quantifiable DNA. Consecutive density fractions were  
419 consolidated *in-silico* (every 2-, 3-, 4 fractions etc) to represent a range of fraction sizes spanning  
420 0.002-0.02 g ml<sup>-1</sup>, and the density shift of the 100 OTUs that were most abundant in all fractions  
421 combined was examined. The estimated magnitude of the density shifts across taxa remained  
422 consistent at a fraction size of up to 0.011 g ml<sup>-1</sup>, expanding previous results that demonstrated  
423 this trend with fractions of 0.003-0.008 g ml<sup>-1</sup> (fig. 2A) (Youngblut, Barnett, and Buckley 2018).  
424 The same data can be represented as a relative error, which is defined here as the density shift in  
425 resolution  $r$  ( $r < \text{original number of fractions}$ ) compared to the density shift with maximum  
426 resolution. When the relative error is high there is a higher probability of mis-assigning taxa as  
427 incorporators when they are not and vice versa. There was a positive linear correlation ( $R^2 =$   
428 0.95) between fraction size and mean relative error (fig. 2B). Additionally, the increase in the  
429 mean relative error is accompanied by an increase in its variation, further emphasizing the risk of  
430 type II errors.

431

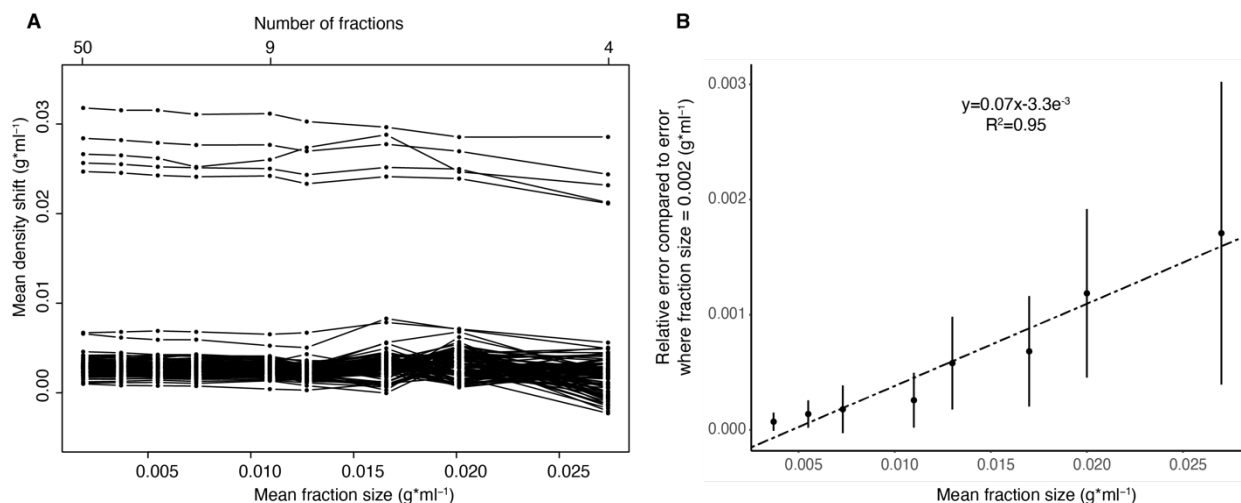

432

433

434 **Figure 2: variation in estimated isotopic enrichment declines with smaller density fractions**  
435 **in unreplicated data**

436 (A) Mean fraction size, while smaller than 0.011 g ml<sup>-1</sup> (corresponding to 9 fractions in a 5 ml  
437 ultracentrifuge tube), does not affect the density shift of OTUs. Each line represents one OTU.

438 The plot shows the density shift (y axis) of the top 100 most abundant OTUs in seawater

439 enriched with naphthalene. Highly enriched taxa are easily discerned even at a fraction size of  
440 0.02 g ml<sup>-1</sup> (4 fractions), but shifts of less or not enriched OTUS, while remaining within a

441 narrow range, may increase or decrease and negatively affect % atom excess downstream

442 analyses. (B) Relative error was calculated as the absolute difference between density shift in a  
443 fraction size and the density shift when the mean fraction size was 0.0018 g ml<sup>-1</sup> per OTU from

444 the same data.  $RelErr = \text{Mean}(\text{Shift}_r - \text{Shift}_{\text{max}})$  where r is a gradient resolution lower than the  
445 maximum.

446

447 However, when adding replicates, the correlation between the number of fractions on the relative

448 standard deviation of the WMD is no longer linear. Between 2 and 11 fractions, every additional

449 fraction reduces the standard deviation exponentially, whereas with at least 12 fractions the  
450 difference is much smaller and linearly correlated to the number of fractions (fig. 3B).

451

452 *Low inherent variability determines density shift detection limit*

453

454 To identify statistically significant density shifts between samples treated with a labeled substrate  
455 versus a control (unlabeled substrate), it is critical to know the detection limit of density shifts.  
456 To define a detection limit, we calculated the inherent variability in weighted mean density of  
457 unlabeled DNA from various taxa in a highly replicated experiment enriching soil with 18O-  
458 water (N=10). We extended this analysis to explore the impact of gradient resolution reduction  
459 on this variability. This was done by merging and averaging data from an increasing number of  
460 consecutive fractions. The initial analysis with medium resolution (fraction size 0.007 g ml<sup>-1</sup>; 11-  
461 17 fractions in a 4.7 ml tube) revealed that the weighted mean density of abundant taxa varied  
462 little between replicates (fig. 3A). At a 95% confidence level (two standard deviations), the mean  
463 of replicates per taxon varied at a median value of 0.004-0.007 g ml<sup>-1</sup> at gradient resolutions  
464 varying from 0.007-0.034 g ml<sup>-1</sup> variation of 90% of the taxa was always lower than the fraction  
465 size. The variation remains comparable with lower gradient resolution down to a fraction size of  
466 0.027 g ml<sup>-1</sup>, and only increases significantly (ANOVA, Tukey 95% confidence level) at a  
467 fraction size of 0.034 g ml<sup>-1</sup> (3 fractions in a 4.7 ml tube) (fig. 3A). Further analysis of the  
468 increase in standard deviation compared to the standard deviation with the original 18 fractions  
469 revealed a linear increase between 12 and 18 fractions, and an exponential increase with 2-11  
470 fractions (fig. 3B).

471

472

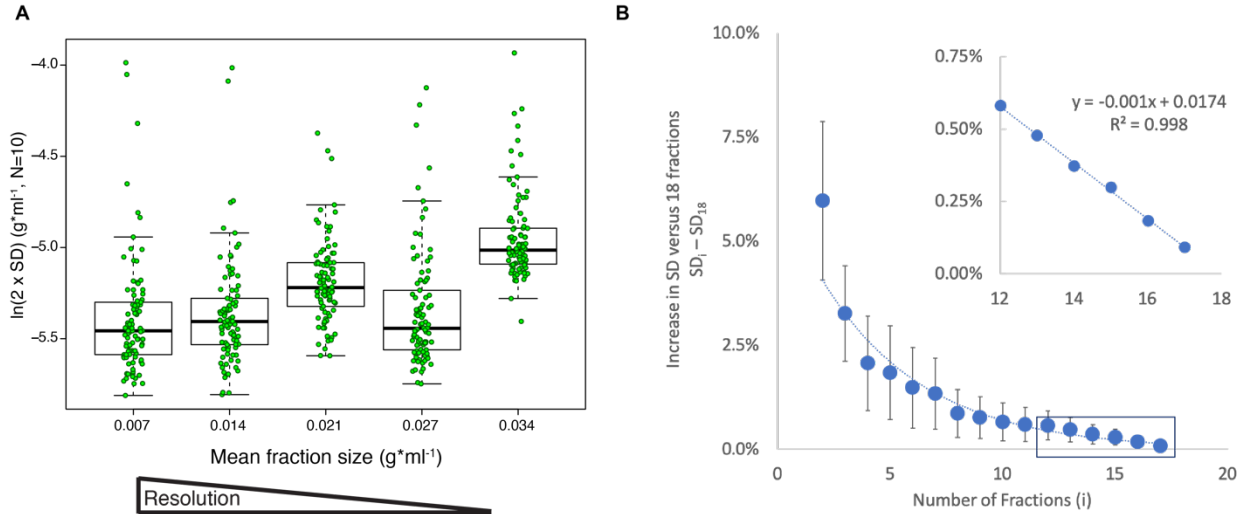

473

474 **Figure 3: Variability in level of enrichment is negatively correlated to the number of**  
475 **density fractions in replicated data**

476 (A) Two standard deviations of the mean buoyant density in the 100 most abundant OTUs from  
477 the unlabeled terrestrial dataset (N=10) as a function of fraction size. Higher fraction size  
478 corresponds to lower gradient resolution. The horizontal line within the box represents the  
479 median, the box represents percentiles 25-75 and whiskers represent percentiles 10 and 90 for  
480 100 OTUs in each fraction size. The raw data is plotted on top of the boxes. (B) Relative error  
481 compared to the original 18 fractions dataset (N=5, 100 permutations) decreases as the number  
482 of fractions increases. The inset shows a linear decrease in relative error when using 12-18  
483 fractions.

484

485 Additionally, the range of relative error increased with fraction size. To explore how this  
486 variation affects the detection of substrate incorporators, we calculated the putative sensitivity  
487 (proportion of true positives) and specificity (proportion of true negatives) as a function of the  
488 shift detection threshold for all gradient resolutions discussed previously. This calculation was

489 performed under the assumption that a density shift higher than a specific threshold in the  
490 original experimental setup (50 fractions) represented significant enrichment. The shift detection  
491 threshold is the smallest difference between labeled and unlabeled WMD that would be  
492 considered a significant density shift. As expected, both parameters were stable down to 0.011 g  
493 ml<sup>-1</sup> density fraction resolution using a shift detection threshold 0.005 g ml<sup>-1</sup> or higher.  
494 Specificity was > 95% for all gradient resolutions at a threshold > 0.003 g ml<sup>-1</sup>, but sensitivity  
495 was more impacted by gradient resolution > 0.013 g ml<sup>-1</sup> (fig. 4).

496

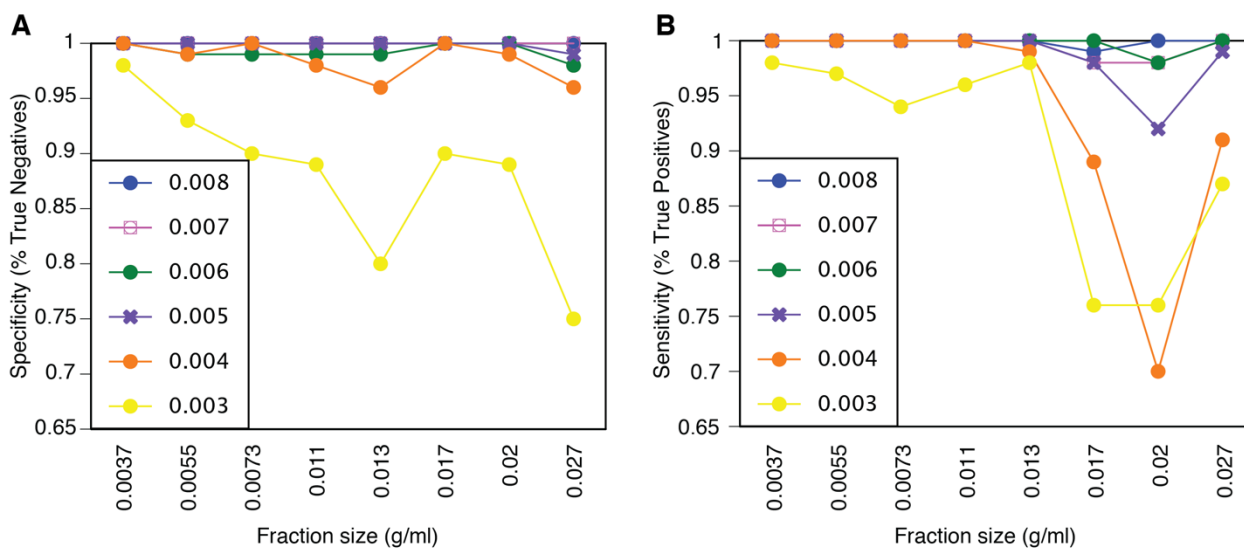

497

498 **Figure 4: Rate of false discoveries increases at low gradient resolution or low shift detection**  
499 **threshold**

500 Specificity (A; rate of true positives) and sensitivity (B; rate of true negatives) calculated over  
501 the 100 most abundant OTUs from naphthalene-enriched seawater. The colors represent  
502 detection limit thresholds.

503

504 In a replicated experiment, the number of replicates and desired statistical power determine the  
505 detection limit. When designing an experiment, it could be valuable to use the desired statistical



506 power and desired enrichment detection threshold to decide on the number of replicates. Both of  
507 these parameters would depend on the scientific purpose of the study. The higher the power and  
508 threshold, the less replicates are necessary (fig. 5).

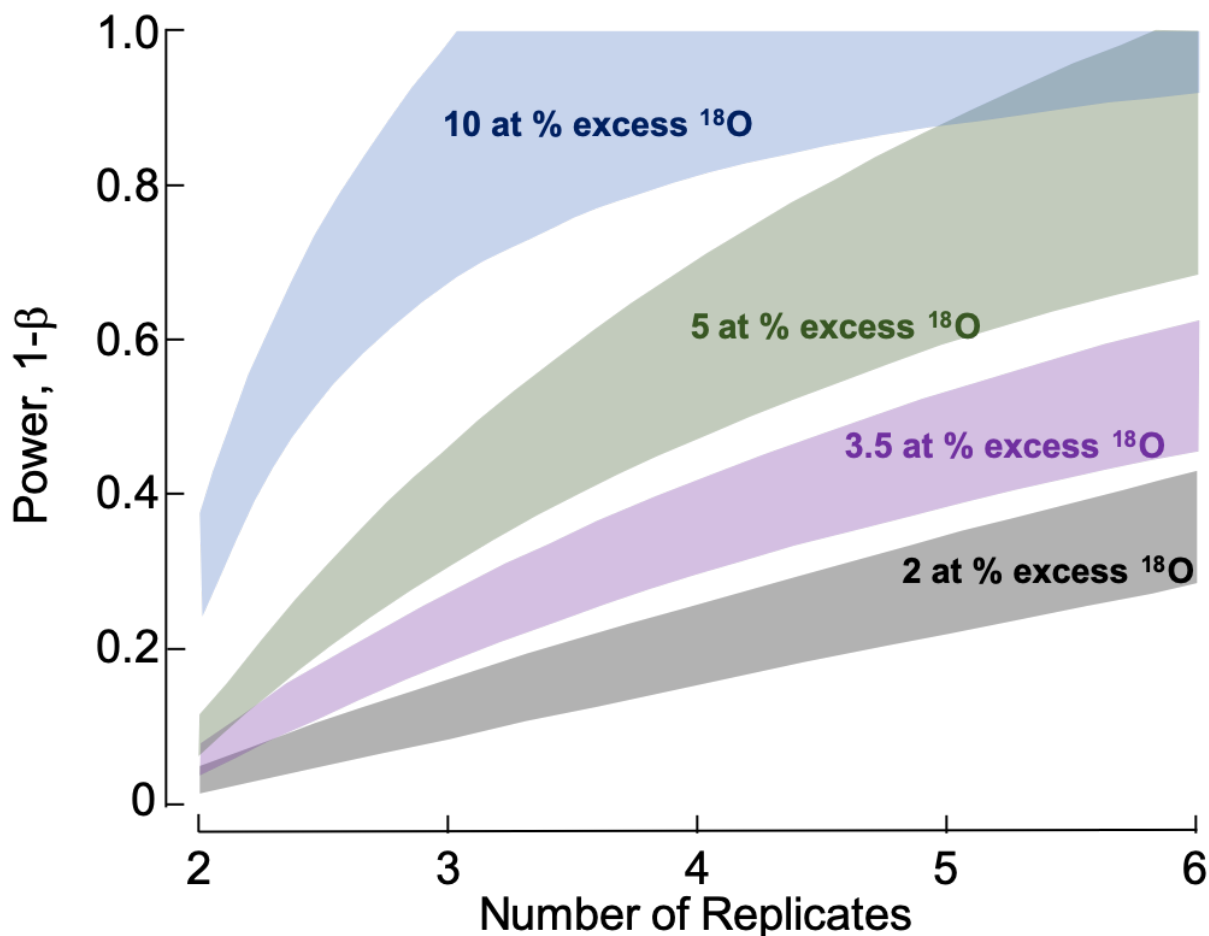

509  
510 **Figure 5: The number of replicates of a qSIP experiment determines the statistical power**  
511 **of enrichment detection and the detection limit**

512 10 atom percent enrichment (APE) by incorporation of 0.0065 g ml<sup>-1</sup> <sup>18</sup>O labeled substrates  
513 would correspond to 12.6 APE with the same incorporation of <sup>13</sup>C substrates or 6.3 APE with  
514 <sup>15</sup>N substrates.

515

516

517 *Variation in mean weighted density is greater within than between spins*

518

519 DNA extracted from pure cultures of unlabeled *Escherichia coli* and unlabeled or 100%  $^{13}\text{C}$ -

520 labeled *Pseudomonas putida* was aliquoted into replicates, ultracentrifuged in CsCl and

521 fractionated. The difference in %GC of the genomes of these organisms (i.e. distance between

522 their peak densities) permitted calculation of their WMD even when both were unlabeled.

523 Comparing the mean of WMD of replicates of *E. coli* between spins revealed negligible

524 variation. However, the range of mean weighted densities within a spin was up to  $0.004 \text{ g ml}^{-1}$

525 (fig. 6).

526 Similar results were obtained by spinning triplicates of genomic mock communities comprised of

527 four organisms with distinguishable genomic %GC. In these experiments between-spin variation

528 was  $0.0013\text{-}0.0025 \text{ g ml}^{-1}$ , whereas within-spin variation ranged up to  $0.0056 \text{ g ml}^{-1}$  (sup. Fig.

529 S1, sup. table S2 (raw data)).

530

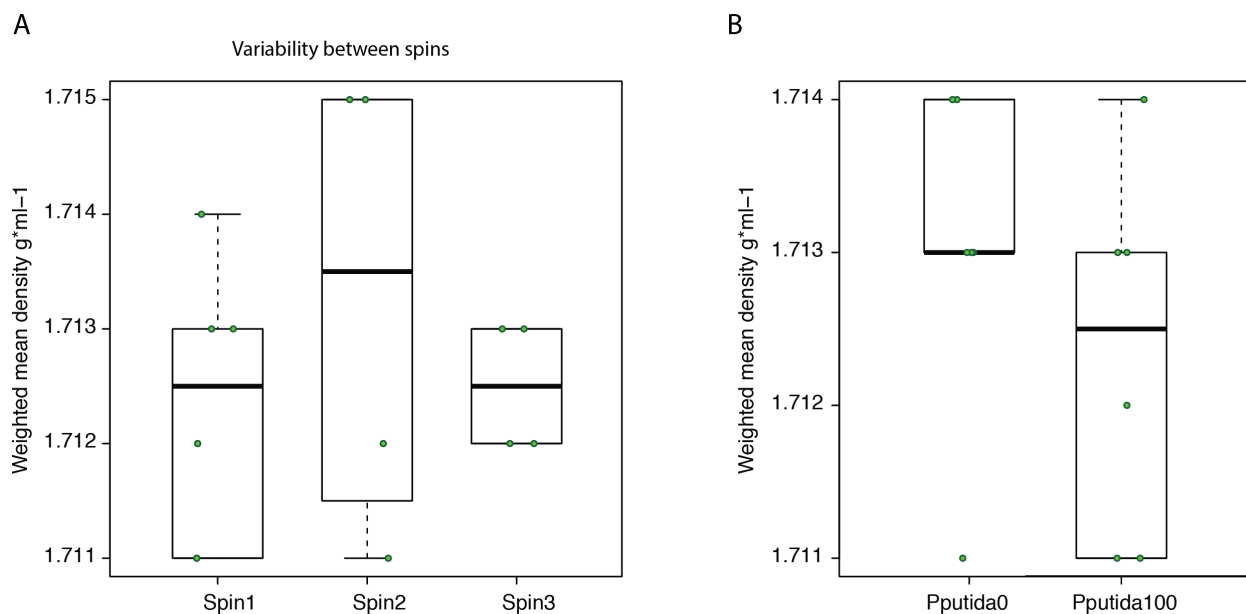

531

532

533 **Figure 6: Tube-to-tube variability and effect of other taxa**

534 Variability in the weighted mean density (rounded to 3 decimal places) of unlabeled *Escherichia*  
535 *coli* (A) between spins (N=6, N=4, N=4 respectively) in the presence of labeled *Pseudomonas*  
536 *putida* at 100 atom%  $^{13}\text{C}$  and (B) within the same spin in the presence of unlabeled vs. labeled *P.*  
537 *putida* at 100 atom%  $^{13}\text{C}$  (N=6).

538

539 *Using genomic mock communities to explore density to GC content conversion*

540

541 One potential strategy for decreasing the cost of metagenomic SIP experiments is to sequence  
542 only the labeled samples and calculate an approximate density shift using the %GC of the  
543 genomic bins. The conversion of density to the GC content of a genome is a linear function of  
544 the unlabeled ( $^{12}\text{C}$ ) weighted mean. There is a canonical equation describing this function  
545 (Rickwood and Birnie 1978; Schildkraut, Marmur, and Doty 1962; Buckley et al. 2007) but it  
546 has also been determined empirically in the past by using a ladder of three bacterial taxa with  
547 varying GC contents (Hungate et al. 2015). However, if the equation was identical for each  
548 gradient in a SIP experiment, as is usually assumed, unlabeled replicates of the same organism  
549 would have had the exact same weighted mean in every run. As shown here and previously, this  
550 is not the case (Hungate et al. 2015; Morando and Capone 2016). To address this variation, we  
551 ran 9 replicates of a mock community with a wide range of known GC content, generated a  
552 calibration curve from each one and fitted an equation to it.

553 This mock community, consisting of high molecular weight genomic DNA from 4 bacterial taxa,  
554 revealed highly correlated linear relationships (N=9,  $R^2 > 0.94$ ) between mean weighted density  
555 and %GC, but with a variance in slopes and intercepts (table 1). There was a significant

556 difference between the weighted mean density as calculated according to the canonical equation  
557 and the observed mean of weighted mean density per genome over all replicates (N=9, paired t-  
558 test, p=0.02). For example, using the canonical equation (Schildkraut, Marmur, and Doty 1962)  
559 on replicate 1 would lead to GC content of the mock community members to appear as 38%,  
560 46.5%, 62% and 72.1% respectively. We also noticed that the difference between observed and  
561 expected mean weighted density decreased as %GC increased (table. 2).

562

563 **Table 2: Observed vs. expected GC content for known genomes varies between replicates**

564 Calculated %GC (Schildkraut, Marmur, and Doty 1962), slope and intercept between replicates  
565 of the genomic mock community. The header row shows the known %GC per genome.

566

| Replicate | 34.5% | 45.9% | 60.1% | 72.7% | slope  | intercept | R <sup>2</sup> |
|-----------|-------|-------|-------|-------|--------|-----------|----------------|
| 1         | 37.8% | 46.9% | 62.2% | 72.4% | 0.0904 | 1.6654    | 0.995          |
| 2         | 37.8% | 52%   | 64.3% | N/A   | 0.0985 | 1.6642    | 0.984          |
| 3         | 40.8% | 48%   | 64.3% | 75.5% | 0.0934 | 1.6661    | 0.993          |
| 4         | 39.8% | 48%   | 64.3% | 76.5% | 0.0978 | 1.6639    | 0.995          |
| 5         | 40.8% | 50%   | 66.3% | 78.6% | 0.0989 | 1.6652    | 0.997          |
| 6         | NA    | 45.9% | 53.1% | 68.4% | 0.0817 | 1.666     | 0.943          |
| 7         | 39.8% | 50%   | 63.3% | 74.5% | 0.0904 | 1.6677    | 0.999          |

|      |       |     |       |       |        |        |        |
|------|-------|-----|-------|-------|--------|--------|--------|
| 8    | 40.8% | 51% | 63.3% | 75.5% | 0.0889 | 1.6689 | 0.9998 |
| 9    | 42.9% | 52% | 65.3% | N/A   | 0.0869 | 1.6713 | 0.9998 |
| mean | 39.8% | 49% | 63.3% | 74.5% | 0.0895 | 1.6678 | 0.9998 |

567

## 568 Discussion

569

570 SIP is a powerful tool for investigating taxon-specific microbial functions in complex  
571 assemblages. Like any method, SIP-derived measurements have some inherent variability which  
572 can be managed – within limits – to address the research questions of interest. Our results show  
573 how this can be done given a particular research question and the level of sensitivity / detection  
574 demanded by that research question. Despite the wide use of SIP, there has been little  
575 benchmarking of interpretation of its results. Here we attempted to shed light on some practical  
576 aspects of the method and discuss how to adjust it to maximize results.

577 Variation of the mean weighted density (WMD) of the same unlabeled taxon over numerous  
578 replicates, observed even between samples processed simultaneously and in the same manner,  
579 implies that there are unpredictable physical and/or chemical factors unrelated to genomic %GC  
580 affecting SIP analyses. The variability these factors create can determine the limit of density shift  
581 detection. Both the unlabeled WMD variation and interpretation error analyses performed here  
582 imply that when using qSIP a detection limit balancing Type-I and Type-II errors may revolve  
583 around 0.005 g ml<sup>-1</sup> in unreplicated <sup>13</sup>C experiments when dividing the density gradient into at  
584 least 4 density fractions. Replication would lead to increased statistical power using the same  
585 detection limit. However, density-shift estimates of taxon-specific isotope incorporation are

586 broadly robust across a wide range of fraction sizes. For example, the relative error of high  
587 incorporators only varied by an average of 0.02% in shift from fraction size 0.002-0.011 g ml<sup>-1</sup>  
588 (N=5, 50 to 9 fractions in a 5.1 ml tube).

589 In reality, WMD variation means that the same organism may peak at a density anywhere within  
590 a specific range. Moreover, the unlabeled mean and labeled mean of a single replicate can  
591 deviate in different directions, increasing the observed density shift and leading to a Type I error,  
592 and the potential for such deviation increases at low gradient resolution. This may explain why  
593 the variation in the relative error increases as resolution decreases.

594 Low gradient resolution in combination with higher variability may also lead to false  
595 classification of borderline taxa as incorporators when they are not (Type I error) and vice versa  
596 (Type II error). For example, a simulation model (Youngblut, Barnett, and Buckley 2018)  
597 showed that the rate of true negatives (specificity) and true positives (sensitivity) of qSIP is 88%  
598 and >90% respectively, with virtually no effect of fraction size at the range of 0.003-0.008 g ml<sup>-1</sup>.

599 1. When examining the specificity and sensitivity of qSIP using real unreplicated data over a  
600 wider range of fraction sizes we found that gradient resolution and shift detection limit both had  
601 an effect. However, the reliability of qSIP remained extremely high as long as the detection limit  
602 was 0.005 g ml<sup>-1</sup> or higher (Specificity > 90% and sensitivity > 95%) regardless of gradient  
603 resolution. This detection limit is comparable to 2 standard deviations of unreplicated unlabeled  
604 weighted mean density, further supporting that analysis. Experimental replication, even as low as  
605 3 replicates, can increase the power of this analysis to have virtually no error using a similar  
606 detection threshold. Our analysis can be used for experimental design based on the desired  
607 statistical power.

608 The reduction of the number of density fractions we addressed in this study could significantly  
609 mitigate labor and sequencing costs. While helpful for amplicon-SIP, this reduction is crucial for  
610 metagenomic SIP (MG-SIP). The combination of metagenomics and SIP, first attempted over a  
611 decade ago (Dumont et al. 2006; Schwarz, Waschkowitz, and Daniel 2006), involves sequencing  
612 metagenomes instead of amplified marker genes from density fractions, and assembly of  
613 genomic bins from those metagenomes. Genomic bins that shift to a higher density can then be  
614 identified and their metabolism explored directly. Many of the obstacles that were brought up in  
615 the past with regards to MG-SIP (Chen and Murrell 2010) were addressed by the improvement in  
616 sequencing platforms and library preparation kits, such as low DNA yield, MDA biases and low  
617 throughput. Still, so far studies combining metagenomics and SIP included shotgun sequencing  
618 of labeled DNA, a few heavy fractions, or at best also sequenced 2-3 light fractions  
619 (Dombrowski et al. 2016; Fortunato and Huber 2016; Thomas, Corre, and Cébron 2019). This  
620 approach limits detection of substrate incorporators in several ways: (1) choosing which fractions  
621 to sequence relies on density shift of the entire community, which may be subtle (2) low GC  
622 genomes, even if highly enriched, may not become heavy enough to reach the heavy fractions,  
623 (3) low GC genomic islands may not be well-covered and therefore not assembled for the same  
624 reason, leading to increased genome fragmentation (sup. fig. S2), (4) depending on the density of  
625 the fractions sequenced, high GC genomes may be highly represented regardless of enrichment,  
626 (5) an organism may be abundant in the sample but not be enriched enough to reach the heavy  
627 fractions due to additional use of other substrates, in which case it could take up a good amount  
628 of the labeled substrate but not be detected and (6) abundant organisms can be found in all  
629 density fractions as demonstrated here and previously (Youngblut, Barnett, and Buckley 2018),  
630 hence they may be erroneously classified as incorporators when sequencing only heavy fractions.

631 We propose that sequencing all fractions should overcome all of these obstacles. A study  
632 demonstrating the feasibility of this approach using qSIP with 3 density fractions in soil has been  
633 published recently (Starr et al. 2018). The use of low gradient resolution limits detection to  
634 highly enriched taxa. However, medium gradient resolution along with the decreasing price of  
635 shotgun sequencing should still keep the financial and computational costs of MG-SIP  
636 manageable while maintaining the detection limit achievable at high resolution. Specifically, our  
637 data suggests that circa 10 density fractions (fraction size  $0.011 \text{ g ml}^{-1}$ ) the increase in error  
638 compared to higher resolution is minor.

639 All commonly used SIP protocols rely on a linear conversion between mean weighted density of  
640 the unlabeled genome and its GC content (Schildkraut, Marmur, and Doty 1962; Buckley et al.  
641 2007; Neufeld et al. 2007; T. Lueders 2010; Murrell and Whiteley 2010). Once again, this  
642 inherent variation implies that GC content cannot be accurately converted to density with a  
643 canonical equation (Schildkraut, Marmur, and Doty 1962). Rather, we may need to create a  
644 calibration curve of %GC/WMD per tube by using an internal standard, as these equations have a  
645 very high  $R^2$  but with varying slopes and intercepts. An accurate conversion between MWD and  
646 %GC may become extremely important for SIP experiments in which metagenomes are  
647 sequenced only from the heavy fractions of labeled samples. Once genomic bins are assembled,  
648 their %GC can be converted into a theoretical unlabeled WMD which can be used to calculate  
649 the density shift, and thus the enrichment level of those bins. A reliable calculation may allow us  
650 to avoid analyzing most of the unlabeled controls, and thus save on labor and costs

651 To demonstrate the costs of high-resolution MG-SIP, we compared the resources and yield of a  
652 simplified experiment. High resolution SIP routinely generates 40-60 density fractions.  
653 Assuming the conservative number of 40 fractions, we would generate 40 metagenomes from



654 each tube. As we would sequence not only the isotopically labeled fractions but also the control  
655 fractions, we would be looking at 80 metagenomes. Furthermore, for a minimum of 3 replicates,  
656 the number would increase to 240 metagenomes. Assuming shallow sequencing of 2 Gbp per  
657 metagenome, the sequencing process would yield 480 Gbp that would need to be stored,  
658 manipulated and assembled. Using the latest NovaSeq platform that produces higher yield at a  
659 lower cost per-base, we would still require 5 lanes on the sequencer. The cost of these combined  
660 with library preparation would currently revolve around \$50,000  
661 ([http://qb3.berkeley.edu/gsl/wp-content/uploads/2018/08/2018\\_2019-QB3-Genomics-](http://qb3.berkeley.edu/gsl/wp-content/uploads/2018/08/2018_2019-QB3-Genomics-Rates_August.pdf)  
662 [Rates\\_August.pdf](http://qb3.berkeley.edu/gsl/wp-content/uploads/2018/08/2018_2019-QB3-Genomics-Rates_August.pdf)). In addition, there would be a cost in labor or robot facility time for  
663 fractionation, precipitation, ethanol washing and elution. As stated, this would be a highly  
664 simplified experiment. All of these costs would increase when adding time-points or other  
665 experimental conditions such as different temperatures, other nutrients etc.

666 Reducing the number of fractions to 10 would yield a relative error lower than  $0.0005 \text{ g ml}^{-1}$   
667 which is negligible considering that the standard deviation of the WMD is at least 3 times higher  
668 than that even when using an automated pipeline. Below a fraction size of  $0.011 \text{ g ml}^{-1}$  the mean  
669 relative error increase, as does its variability, in both replicated and unreplicated datasets.

670 However, this increase in variability can still be mitigated by reallocating some of the funds  
671 towards replication. In fact, reducing the number of fractions even by a factor of 2 will allow for  
672 doubling the number of replicates without additional costs, while increasing the statistical power  
673 of any downstream analyses.

674 With MG-SIP we would, in theory, already have the GC content of a genomic bin, so that it  
675 would not need to be calculated from the mean weighted density, in which case the control  
676 would be used only to calculate the density shift. That being said, we expect that the genomic

677 bins generated from metagenomes will not be complete, therefore they may also have some error  
678 rate in GC content calculation. When combining MG-SIP with an internal %GC/density ladder,  
679 we could significantly decrease the number of unlabeled controls sequenced and use the  
680 calibration curve from the labeled tubes with the GC content of the bin to calculate the unlabeled  
681 WMD and the density shift. The internal standard should be easily informatically separable from  
682 the sample. This could be done by creating a mock community of organisms which are highly  
683 unlikely to appear in the sample (e.g. in a soil sample use genomes of strictly marine organisms)  
684 and could be customizable per experiment. Due to the variation within spin, an external ladder (a  
685 mock community in a separate ultracentrifuge tube) would be insufficient. However, it could be  
686 argued that finding a suitable set of non-indigenous genomes distinguishable from a highly  
687 diverse environment such as soil may prove difficult. Alternatively, if highly complete genomic  
688 bins can be assembled, then their %GC would be more reliable, and their WMD can be  
689 calculated from the gradient. Such bins could be used as an internal standard for generating a  
690 WMD-to-GC formula. As the generation of high-completion bins could only be assessed post  
691 hoc, we would still recommend the use of an internal standard.

692 The inherent variability in qSIP can stem from many steps along the way: replicate variation,  
693 bottle effects during incubation, extraction efficiencies, tube to tube variation in the gradient,  
694 amplification bias, strain heterogeneity, among-treatment shifts in community composition, and  
695 OTU clustering errors (for marker genes). Quantifying the sensitivity of qSIP to those factors  
696 will improve existing amplicon-based qSIP techniques and facilitate efficient ways of extending  
697 SIP to more ambitious applications, such as metagenome-assembled genome-based SIP.

698

699

## 700 Acknowledgements

701

702 The authors would like to thank the SPRUCE team, Michaela Hayer, Paul Dijkstra, Sheryl Bell  
703 and Ember Morrissey for generously providing data, and Andy Tomatsu at the DOE Joint  
704 Genome Institute for operating the high throughput SIP pipeline for the mock communities.  
705 Support for analyses and data integration was provided by the U.S. Department of Energy,  
706 Office of Biological and Environmental Research, Genomic Science Program LLNL ‘Microbes  
707 Persist’ Scientific Focus Area (award #SCW1632), and awards DE-SC0016207 and DE-  
708 SC0020172 at Northern Arizona University. Work conducted at LLNL was contributed under  
709 the auspices of the US Department of Energy under Contract DE-AC52-07NA27344, and at the  
710 Lawrence Berkeley National Laboratory through Contract No. DE-AC02-05CH11231.

711

## 712 References

- 713 Apprill, A., S. McNally, R. Parsons, and L. Weber. 2015. “Minor Revision to V4 Region SSU  
714 rRNA 806R Gene Primer Greatly Increases Detection of SAR11 Bacterioplankton.” *Aquatic*  
715 *Microbial Ecology: International Journal* 75 (2): 129–37.
- 716 Barnett, Samuel E., and Daniel H. Buckley. 2020. “Simulating Metagenomic Stable Isotope  
717 Probing Datasets with MetaSIPsim.” *BMC Bioinformatics* 21 (1): 37.
- 718 Barnett, Samuel E., Nicholas D. Youngblut, and Daniel H. Buckley. 2019. “Data Analysis for  
719 DNA Stable Isotope Probing Experiments Using Multiple Window High-Resolution SIP.”  
720 *Methods in Molecular Biology*. [https://doi.org/10.1007/978-1-4939-9721-3\\_9](https://doi.org/10.1007/978-1-4939-9721-3_9).
- 721 Blazewicz, Steven J., and Egbert Schwartz. 2011. “Dynamics of  $^{18}\text{O}$  Incorporation from  $\text{H}_2$   $^{18}\text{O}$   
722 into Soil Microbial DNA.” *Microbial Ecology* 61 (4): 911–16.
- 723 Blazewicz, Steven J., Egbert Schwartz, and Mary K. Firestone. 2014. “Growth and Death of  
724 Bacteria and Fungi Underlie Rainfall-Induced Carbon Dioxide Pulses from Seasonally Dried  
725 Soil.” *Ecology* 95 (5): 1162–72.
- 726 Bolger, Anthony M., Marc Lohse, and Bjoern Usadel. 2014. “Trimmomatic: A Flexible Trimmer  
727 for Illumina Sequence Data.” *Bioinformatics* 30 (15): 2114–20.
- 728 Buckley, D. H., V. Huangyutitham, S-F Hsu, and T. A. Nelson. 2007. “Stable Isotope Probing  
729 with  $^{15}\text{N}$  Achieved by Disentangling the Effects of Genome G+C Content and Isotope  
730 Enrichment on DNA Density.” *Applied and Environmental Microbiology* 73 (10): 3189–95.
- 731 Chen, Yin, and J. Colin Murrell. 2010. “When Metagenomics Meets Stable-Isotope Probing:  
732 Progress and Perspectives.” *Trends in Microbiology* 18 (4): 157–63.

- 733 Colin Murrell, J., and Andrew S. Whiteley. 2010. *Stable Isotope Probing and Related*  
734 *Technologies*. American Society for Microbiology Press.
- 735 Dombrowski, Nina, John A. Donaho, Tony Gutierrez, Kiley W. Seitz, Andreas P. Teske, and  
736 Brett J. Baker. 2016. “Reconstructing Metabolic Pathways of Hydrocarbon-Degrading  
737 Bacteria from the Deepwater Horizon Oil Spill.” *Nature Microbiology* 1 (7): 16057.
- 738 Dumont, Marc G., and Marcela Hernández García. 2019. *Stable Isotope Probing: Methods and*  
739 *Protocols*. Springer New York.
- 740 Dumont, Marc G., Stefan M. Radajewski, Carlos B. Miguez, Ian R. McDonald, and J. Colin  
741 Murrell. 2006. “Identification of a Complete Methane Monooxygenase Operon from Soil by  
742 Combining Stable Isotope Probing and Metagenomic Analysis.” *Environmental*  
743 *Microbiology* 8 (7): 1240–50.
- 744 Edgar, Robert C. 2010. “Search and Clustering Orders of Magnitude Faster than BLAST.”  
745 *Bioinformatics* 26 (19): 2460–61.
- 746 Fierer, Noah, Jason A. Jackson, Rytas Vilgalys, and Robert B. Jackson. 2005. “Assessment of  
747 Soil Microbial Community Structure by Use of Taxon-Specific Quantitative PCR Assays.”  
748 *Applied and Environmental Microbiology* 71 (7): 4117–20.
- 749 Fortunato, Caroline S., and Julie A. Huber. 2016. “Coupled RNA-SIP and Metatranscriptomics  
750 of Active Chemolithoautotrophic Communities at a Deep-Sea Hydrothermal Vent.” *The*  
751 *ISME Journal* 10 (8): 1925–38.
- 752 Hungate, Bruce A., Rebecca L. Mau, Egbert Schwartz, J. Gregory Caporaso, Paul Dijkstra,  
753 Natasja van Gestel, Benjamin J. Koch, et al. 2015. “Quantitative Microbial Ecology through  
754 Stable Isotope Probing.” *Applied and Environmental Microbiology* 81 (21): 7570–81.
- 755 Kang, Dongwan D., Feng Li, Edward Kirton, Ashleigh Thomas, Rob Egan, Hong An, and Zhong  
756 Wang. 2019. “MetaBAT 2: An Adaptive Binning Algorithm for Robust and Efficient  
757 Genome Reconstruction from Metagenome Assemblies.” *PeerJ* 7 (July): e7359.
- 758 Koch, Benjamin J., Theresa A. McHugh, Michaela Hayer, Egbert Schwartz, Steven J. Blazewicz,  
759 Paul Dijkstra, Natasja Gestel, et al. 2018. “Estimating Taxon-specific Population Dynamics  
760 in Diverse Microbial Communities.” *Ecosphere*. <https://doi.org/10.1002/ecs2.2090>.
- 761 Kozich, James J., Sarah L. Westcott, Nielson T. Baxter, Sarah K. Highlander, and Patrick D.  
762 Schloss. 2013. “Development of a Dual-Index Sequencing Strategy and Curation Pipeline  
763 for Analyzing Amplicon Sequence Data on the MiSeq Illumina Sequencing Platform.”  
764 *Applied and Environmental Microbiology* 79 (17): 5112–20.
- 765 Langmead, B., and S. L. Salzberg. 2013. “Langmead. 2013. Bowtie2.” *Nature Methods* 9: 357–  
766 59.
- 767 Li, Dinghua, Chi-Man Liu, Ruibang Luo, Kunihiko Sadakane, and Tak-Wah Lam. 2015.  
768 “MEGAHIT: An Ultra-Fast Single-Node Solution for Large and Complex Metagenomics  
769 Assembly via Succinct de Bruijn Graph.” *Bioinformatics* 31 (10): 1674–76.
- 770 Lueders, Tillmann 2010. “Stable Isotope Probing of Hydrocarbon-Degraders.” In *Handbook of*  
771 *Hydrocarbon and Lipid Microbiology*, edited by Kenneth N. Timmis, 4011–26. Berlin,  
772 Heidelberg: Springer Berlin Heidelberg.
- 773 Lueders, Tillmann, Mike Manefield, and Michael W. Friedrich. 2004. “Enhanced Sensitivity of  
774 DNA- and rRNA-Based Stable Isotope Probing by Fractionation and Quantitative Analysis  
775 of Isopycnic Centrifugation Gradients.” *Environmental Microbiology* 6 (1): 73–78.
- 776 Manefield, Mike, Andrew S. Whiteley, Robert I. Griffiths, and Mark J. Bailey. 2002. “RNA  
777 Stable Isotope Probing, a Novel Means of Linking Microbial Community Function to  
778 Phylogeny.” *Applied and Environmental Microbiology* 68 (11): 5367–73.

- 779 Morando, Michael, and Douglas G. Capone. 2016. “Intraclade Heterogeneity in Nitrogen  
780 Utilization by Marine Prokaryotes Revealed Using Stable Isotope Probing Coupled with Tag  
781 Sequencing (Tag-SIP).” *Frontiers in Microbiology* 7 (December): 1932.
- 782 Neufeld, Josh D., Jyotsna Vohra, Marc G. Dumont, Tillmann Lueders, Mike Manefield, Michael  
783 W. Friedrich, and J. Colin Murrell. 2007. “DNA Stable-Isotope Probing.” *Nature Protocols*  
784 2 (4): 860–66.
- 785 Papp, Katerina, Rebecca L. Mau, Michaela Hayer, Benjamin J. Koch, Bruce A. Hungate, and  
786 Egbert Schwartz. 2018. “Quantitative Stable Isotope Probing with H<sub>2</sub>18O Reveals That  
787 Most Bacterial Taxa in Soil Synthesize New Ribosomal RNA.” *The ISME Journal*, July.  
788 <https://doi.org/10.1038/s41396-018-0233-7>.
- 789 Parada, Alma E., David M. Needham, and Jed A. Fuhrman. 2016. “Every Base Matters:  
790 Assessing Small Subunit rRNA Primers for Marine Microbiomes with Mock Communities,  
791 Time Series and Global Field Samples.” *Environmental Microbiology* 18 (5): 1403–14.
- 792 Pruesse, Elmar, Jörg Peplies, and Frank Oliver Glöckner. 2012. “SINA: Accurate High-  
793 Throughput Multiple Sequence Alignment of Ribosomal RNA Genes.” *Bioinformatics* 28  
794 (14): 1823–29.
- 795 Quinlan, Aaron R. 2014. “BEDTools: The Swiss-Army Tool for Genome Feature Analysis.”  
796 *Current Protocols in Bioinformatics / Editorial Board, Andreas D. Baxevanis ... [et Al.]* 47  
797 (1): 11–12.
- 798 Radajewski, S., P. Ineson, N. R. Parekh, and J. C. Murrell. 2000. “Stable-Isotope Probing as a  
799 Tool in Microbial Ecology.” *Nature* 403 (6770): 646–49.
- 800 Radajewski, Stefan, Ian R. McDonald, and J. Colin Murrell. 2003. “Stable-Isotope Probing of  
801 Nucleic Acids: A Window to the Function of Uncultured Microorganisms.” *Current*  
802 *Opinion in Biotechnology* 14 (3): 296–302.
- 803 Rickwood, D., and G. D. Birnie. 1978. “1 – Introduction: Principles and Practices of  
804 Centrifugation.” *Centrifugal Separations in Molecular and Cell Biology*, 1–6.
- 805 Schildkraut, C. L., J. Marmur, and P. Doty. 1962. “Determination of the Base Composition of  
806 Deoxyribonucleic Acid from Its Buoyant Density in CsCl.” *Journal of Molecular Biology* 4  
807 (June): 430–43.
- 808 Schloss, Patrick D., Sarah L. Westcott, Thomas Ryabin, Justine R. Hall, Martin Hartmann, Emily  
809 B. Hollister, Ryan A. Lesniewski, et al. 2009. “Introducing Mothur: Open-Source, Platform-  
810 Independent, Community-Supported Software for Describing and Comparing Microbial  
811 Communities.” *Applied and Environmental Microbiology* 75 (23): 7537–41.
- 812 Schwartz, Egbert. 2007. “Characterization of Growing Microorganisms in Soil by Stable Isotope  
813 Probing with H<sub>2</sub>18O.” *Applied and Environmental Microbiology* 73 (8): 2541–46.
- 814 Schwarz, Sebastian, Tanja Waschowitz, and Rolf Daniel. 2006. “Enhancement of Gene  
815 Detection Frequencies by Combining DNA-Based Stable-Isotope Probing with the  
816 Construction of Metagenomic DNA Libraries.” *World Journal of Microbiology &*  
817 *Biotechnology* 22 (4): 363–68.
- 818 [Sieradzki, Ella T., Michael Morando, and Jed A. Fuhrman. biorxiv “Metagenomics and Stable](#)  
819 [Isotope Probing Offer Insights into Metabolism of Polycyclic Aromatic Hydrocarbons](#)  
820 [Degradors in Chronically Polluted Seawater.”](#) <https://doi.org/10.1101/777730>.
- 821 Starr, Evan P., Shengjing Shi, Steven J. Blazewicz, Alexander J. Probst, Donald J. Herman,  
822 Mary K. Firestone, and Jillian F. Banfield. 2018. “Stable Isotope Informed Genome-  
823 Resolved Metagenomics Reveals That Saccharibacteria Utilize Microbially-Processed Plant-  
824 Derived Carbon.” *Microbiome* 6 (1): 122.

- 825 Team, R. Core. 2018. “R Foundation for Statistical Computing; Vienna, Austria: 2014.” *R: A*  
826 *Language and Environment for Statistical Computing*, 2013.
- 827 Thomas, François, Erwan Corre, and Aurélie Cébron. 2019. “Stable Isotope Probing and  
828 Metagenomics Highlight the Effect of Plants on Uncultured Phenanthrene-Degrading  
829 Bacterial Consortium in Polluted Soil.” *The ISME Journal*, March.  
830 <https://doi.org/10.1038/s41396-019-0394-z>.
- 831 Yeh, Yi-Chun, David M. Needham, Ella T. Sieradzki, and Jed A. Fuhrman. 2018. “Taxon  
832 Disappearance from Microbiome Analysis Reinforces the Value of Mock Communities as a  
833 Standard in Every Sequencing Run.” *mSystems* 3 (3).  
834 <https://doi.org/10.1128/mSystems.00023-18>.
- 835 Youngblut, Nicholas D., Samuel E. Barnett, and Daniel H. Buckley. 2018. “SIPSim: A Modeling  
836 Toolkit to Predict Accuracy and Aid Design of DNA-SIP Experiments.” *Frontiers in*  
837 *Microbiology* 9 (March): 570.
